# Supplementary material for: Air Pollutant Sulfur Dioxide is a Major Risk Factor for Pulmonary Tuberculosis Hospitalizations of HIV-infected Patients: Distribution Lag Non-linear Analyses
Source: Research Square preprint supplement (doi:10.21203/rs.3.rs-1434957/v1), 2022-03-14
Supplement: Supplementary file 1 [file c52c9936ffe5ef0a496a2888.docx]

Table S6. Associations between a 10−unit increase in SO2 or PM2.5 and PTB cases in multi-pollutant DLNM with maximum lag 12 months.

| Lag | SO2 | |  | PM2.5 | |
| --- | --- | --- | --- | --- | --- |
| lag-response | cumulative effect |  | lag-response | cumulative effect |
| 0 | 1.635 (1.186-2.255) * | 1.635 (1.186-2.255) * |  | 0.841 (0.691-1.023) | 0.841 (0.691-1.023) |
| 1 | 1.563 (1.175-2.079) * | 2.556 (1.395-4.684) * |  | 0.853 (0.718-1.014) | 0.717 (0.497-1.035) |
| 2 | 1.494 (1.159-1.927) * | 3.820 (1.623-8.991) * |  | 0.866 (0.737-1.018) | 0.622 (0.370-1.045) |
| 3 | 1.429 (1.135-1.798) * | 5.457 (1.860-16.01) * |  | 0.881 (0.752-1.032) | 0.547 (0.282-1.062) |
| 4 | 1.366 (1.101-1.694) * | 7.452 (2.089-26.58) * |  | 0.896 (0.764-1.051) | 0.491 (0.220-1.094) |
| 5 | 1.306 (1.056-1.614) * | 9.728 (2.287-41.38) * |  | 0.913 (0.776-1.074) | 0.448 (0.175-1.146) |
| 6 | 1.248 (1.001-1.556) * | 12.14 (2.422-60.85) * |  | 0.930 (0.789-1.097) | 0.416 (0.142-1.223) |
| 7 | 1.193 (0.939-1.515) | 14.48 (2.461-85.27) * |  | 0.949 (0.805-1.119) | 0.395 (0.118-1.329) |
| 8 | 1.141 (0.874-1.489) | 16.52 (2.375-114.9) * |  | 0.969 (0.824-1.140) | 0.383 (0.100-1.472) |
| 9 | 1.090 (0.808-1.471) | 18.01 (2.156-150.5) * |  | 0.991 (0.846-1.161) | 0.380 (0.087-1.656) |
| 10 | 1.042 (0.744-1.460) | 18.77 (1.823-193.3) * |  | 1.014 (0.867-1.186) | 0.385 (0.078-1.893) |
| 11 | 0.996 (0.683-1.454) | 18.71 (1.422-246.0) * |  | 1.038 (0.886-1.217) | 0.400 (0.073-2.198) |
| 12 | 0.953 (0.626-1.450) | 17.82 (1.016-312.4) * |  | 1.065 (0.898-1.262) | 0.426 (0.070-2.597) |

Data are shown as RR (95% CI). *, P < 0.05.
