# Supplementary material for: Air Pollutant Sulfur Dioxide is a Major Risk Factor for Pulmonary Tuberculosis Hospitalizations of HIV-infected Patients: Distribution Lag Non-linear Analyses
Source: Research Square preprint supplement (doi:10.21203/rs.3.rs-1434957/v1), 2022-03-14
Supplement: Supplementary file 2 [file cd5d158dcea46ac219f1c666.docx]

Table S4. Associations between a 10−unit increase in SO2 or PM2.5 and PTB cases in multi-pollutant DLNM.

| Lag | SO2 | |  | PM2.5 | |
| --- | --- | --- | --- | --- | --- |
| lag-response | cumulative effect |  | lag-response | cumulative effect |
| 0 | 1.384 (1.012-1.893) * | 1.384 (1.012-1.893) * |  | 0.816 (0.650-1.025) | 0.816 (0.650-1.025) |
| 1 | 1.368 (1.013-1.848) * | 1.894 (1.026-3.495) * |  | 0.831 (0.668-1.033) | 0.678 (0.435-1.057) |
| 2 | 1.352 (1.011-1.809) * | 2.561 (1.039-6.310) * |  | 0.845 (0.682-1.046) | 0.573 (0.298-1.101) |
| 3 | 1.337 (1.006-1.776) * | 3.423 (1.050-11.16) * |  | 0.858 (0.692-1.063) | 0.491 (0.208-1.160) |
| 4 | 1.321 (0.999-1.748) | 4.522 (1.056-19.36) * |  | 0.869 (0.699-1.081) | 0.427 (0.147-1.239) |
| 5 | 1.306 (0.988-1.726) | 5.906 (1.055-33.05) * |  | 0.880 (0.704-1.099) | 0.376 (0.105-1.341) |
| 6 | 1.291 (0.974-1.710) | 7.624 (1.045-55.63) * |  | 0.889 (0.708-1.116) | 0.334 (0.076-1.470) |
| 7 | 1.276 (0.958-1.700) | 9.729 (1.023-92.51) * |  | 0.897 (0.712-1.131) | 0.300 (0.055-1.629) |
| 8 | 1.261 (0.939-1.694) | 12.27 (0.988-152.4) |  | 0.904 (0.715-1.143) | 0.271 (0.040-1.823) |
| 9 | 1.247 (0.918-1.693) | 15.30 (0.939-249.3) |  | 0.909 (0.718-1.152) | 0.246 (0.030-2.054) |
| 10 | 1.232 (0.895-1.696) | 18.85 (0.875-406.0) |  | 0.914 (0.722-1.157) | 0.225 (0.022-2.323) |
| 11 | 1.218 (0.872-1.703) | 22.97 (0.799-659.8) |  | 0.916 (0.725-1.158) | 0.206 (0.016-2.627) |
| 12 | 1.204 (0.847-1.712) | 27.65 (0.713-1072) |  | 0.918 (0.729-1.155) | 0.189 (0.012-2.964) |
| 13 | 1.190 (0.821-1.725) | 32.91 (0.620-1746) |  | 0.918 (0.733-1.149) | 0.174 (0.009-3.321) |
| 14 | 1.176 (0.796-1.740) | 38.72 (0.525-2857) |  | 0.916 (0.736-1.140) | 0.159 (0.007-3.685) |
| 15 | 1.163 (0.770-1.757) | 45.02 (0.431-4702) |  | 0.913 (0.739-1.129) | 0.145 (0.005-4.036) |
| 16 | 1.149 (0.744-1.776) | 51.75 (0.343-7801) |  | 0.909 (0.740-1.118) | 0.132 (0.004-4.348) |
| 17 | 1.136 (0.719-1.797) | 58.79 (0.265-13064) |  | 0.904 (0.737-1.107) | 0.119 (0.003-4.598) |
| 18 | 1.123 (0.693-1.819) | 66.03 (0.197-22116) |  | 0.897 (0.731-1.100) | 0.107 (0.002-4.760) |

Data are shown as RR (95% CI). *, P < 0.05.
